# Supplementary material for: Bayesian optimisation with transfer learning for NASICON-type solid electrolytes for all-solid-state Li-metal batteries
Source: RSC Adv. 2022 Oct 26;12(47):30696–703. doi: 10.1039/d2ra04539g (PMC9597857; doi:10.1039/d2ra04539g)
Supplement: RA-012-D2RA04539G-s001 [file RA-012-D2RA04539G-s001.pdf]

## Supplementary Information

### Bayesian optimisation with transfer learning for NASICON-type solid electrolytes for all-solid-state Li metal batteries

Hiroko Fukuda<sup>a</sup>, Shunya Kusakawa<sup>b</sup>, Koki Nakano<sup>a</sup>, Naoto Tanibata<sup>a</sup>,  
Hayami Takeda<sup>\*a</sup>, Masanobu Nakayama<sup>a</sup>, Masayuki Karasuyama<sup>a</sup>, Ichiro  
Takeuchi<sup>b,c,d</sup>, Takaaki Natori<sup>c</sup> and Yasuharu Ono<sup>c</sup>

<sup>a</sup> *Department of Advanced Ceramics, Nagoya Institute of Technology, Gokiso-cho, Showa-ku, Nagoya, Aichi 466-8555, Japan*

<sup>b</sup> *Department of Computer Science, Nagoya Institute of Technology, Gokiso-cho, Showa-ku, Nagoya, Aichi 466-8555, Japan*

<sup>c</sup> *RIKEN Center for Advanced Intelligence Project, 1-4-1 Nihonbashi, Chuo-ku, Tokyo 103-0027, Japan*

<sup>d</sup> *Faculty of Engineering, Nagoya University, Furo-cho, Chikusa-ku, Nagoya, Aichi 464-8601, Japan*

<sup>e</sup> *TOAGOSEI CO., LTD., General Center of R&D, 8, Showa-cho, Minato-ku, Nagoya, Aichi 455-0026, Japan*

\*Corresponding author. E-mail: [takeda.hayami@nitech.ac.jp](mailto:takeda.hayami@nitech.ac.jp) (Hayami Takeda)

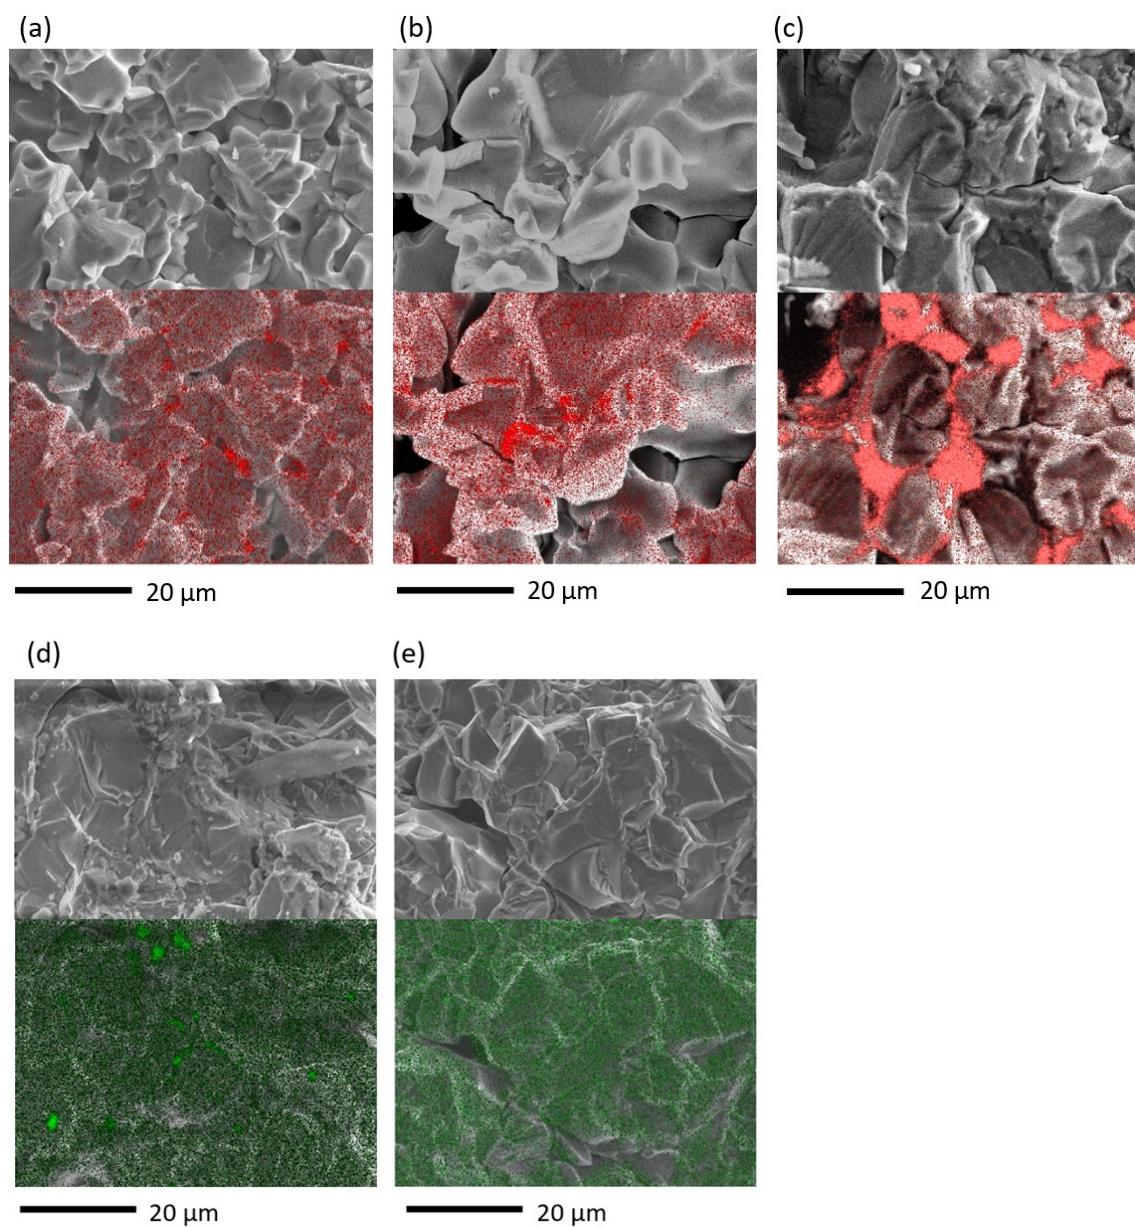

**Fig. S1** EDX elemental maps of calcium (red) and silicon (green) in the fracture surfaces of (a)  $\text{Si}_{0.1}/\text{Ca}_{0.05}$ , (b)  $\text{Si}_{0.1}/\text{Ca}_{0.1}$ , (c)  $\text{Si}_{0.1}/\text{Ca}_{0.3}$ , (d)  $\text{Si}_{0.2}/\text{Ca}_{0.1}$ , and (e)  $\text{Si}_{0.3}/\text{Ca}_{0.1}$ .

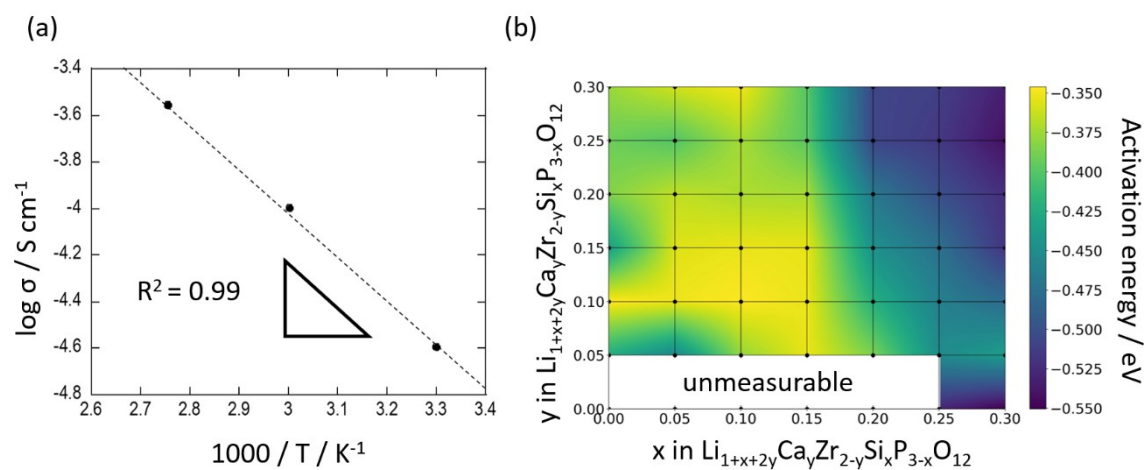

**Fig. S2** (a) Arrhenius plot of the Li-ion conductivity of  $\text{Si}_{0.1}/\text{Ca}_{0.05}$ . (b) Composition dependence of the activation energy for the as-synthesised  $\text{Si}_x/\text{Ca}_y$  pellets.

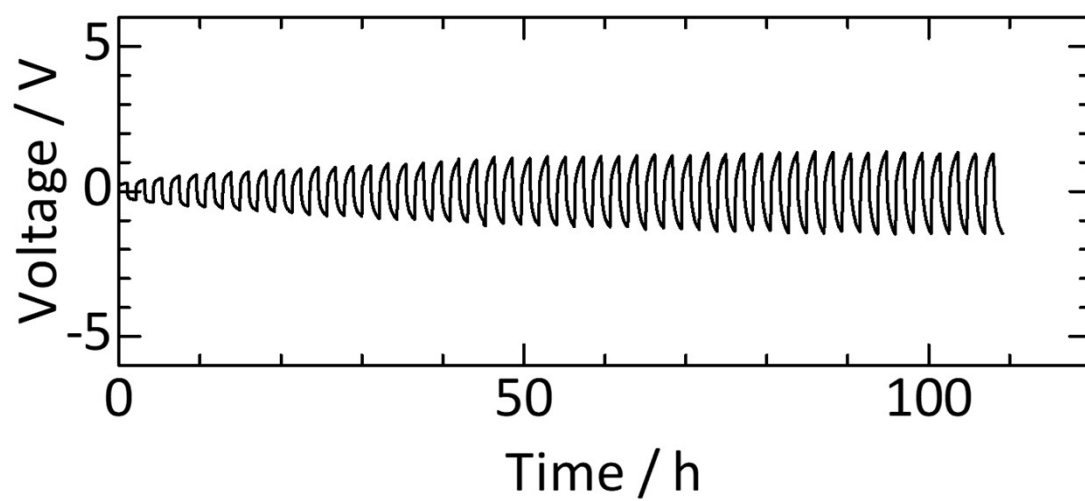

**Fig. S3** Galvanostatic cycle measurement of the Li |  $\text{Li}_{1.2}\text{Ca}_{0.05}\text{Zr}_{1.95}\text{Si}_{0.1}\text{P}_{2.9}\text{O}_{12}$  | Li symmetric cell over a period of 110 h at a current density of  $50 \mu\text{A cm}^{-2}$ .
